# Supplementary material for: Genomic Characterization of IMP-Producing Pseudomonas aeruginosa in Bulgaria Reveals the Emergence of IMP-100, a Novel Plasmid-Mediated Variant Coexisting with a Chromosomal VIM-4
Source: Preprints.org preprint supplement (doi:10.20944/preprints202307.2054.v1), 2023-07-31
Supplement: Supplementary file 1 [file supplementary]

## Sheet: S1. Carba mPCR
Table S1. PCR components and protocol
Carbapenemase genes detection multi-plex PCR protocol							PCR setup program
Reagent	Stock conc	Reaction conc	Vol per 1 react [µl]	Vol for 10 reactions PCR [µl]	Expected fragment size, bp	Approximate fragment melting temperature	Cycles	Temperature	Time
PCR buffer 10x	10	1	2	20		Run electrophoresis		95C	4 min
dNTP mix [mM]	10	0.25	0.5	5			10x Touch-Down	95C	20 s
DHS Taq [U/ µl]	5	0.05	0.2	2				64-55C-TD	35 s
DMSO [%]	100	2	0.4	4				70C	40 s
EVA Green [X]	20	1	1	10			21x	97C	10 s
OXA-48 [µM]	10	0.3	0.6	6	543-555	85C		54C	25 s
KPC [µM]	10	0.16	0.32	3.2	399	92,4C		70C	50 s
GES [µM]	10	0.25	0.5	5	378	87C	Final elongation	72C	3 min
IMP [µM]	10	0.4	0.8	8	172	83.5C	Melting	72-96C
VIM [µM]	10	0.2	0.4	4	247	93.3C
GIM [µM]	10	0.125	0.25	2.5	72
SIM [µM]	10	0.125	0.25	2.5	569
SPM [µM]	10	0.3	0.6	6	798
NDM-1 [µM]	10	0.225	0.45	4.5	111	89.3C
sample DNA, ng/µl	5÷15		2	20
molecular grade Water			9.73	97.3
	Reaction volume:		20	200
Table S1. PCR components and protocol After the melting curve step, some of the detected genes could be identified via the fragment melting temperature. If numerous fragments were amplified or the length doesn't correspond to the expected outcome, it is advisable to run the amplicons on capillary gel electrophoresis for more accurate size determination. Dobavi primerite ot teksta tuka

## Sheet: S2. Cloning protocol template
Insert amplification PCR Protocol					PCR setup program				Vector linearization/amplification PCR Protocol					PCR setup program
No of rxns	10				Cycles	Temperature	Time		No of rxns	10				Cycles	Temperature	Time
PCR rxn vol:	50					98C	10 min		PCR rxn vol:	50					98C	10 min
Reagent	Stock conc	Final conc	Vol per 1 rxn [µl]	Total Vol for for 10 reactions [µl]	18x	97C	10 s		Reagent	Stock conc	Final conc	Vol per 1 rxn [µl]	Total Vol for for 10 reactions [µl]	20x	97C	10 s
PCR buffer 10x	10	1	5	50		64C	25 s		PCR buffer 10x	10	1	5	50		64C	3 min
dNTP mix [mM]	10	0.2	1	10		70C	25 s		dNTP mix [mM]	10	0.25	1.25	12.5
onHybrid Pol	2	0.04	1	10	Final elongation	72C	3 min		onHybrid Pol	2	0.04	1	10	Final elongation	72C	3 min
IMP-new_Clon_F [µM]	10	0.3	1.5	15	Melting	72-96C			pet28A-IMP_tail_LR [µM]	10	0.3	1.5	15	Melting	72-96C
IMP-new_Clon_R [µM]	10	0.3	1.5	15					pet28A-IMP_tail_RF [µM]	10	0.3	1.5	15
MgCl2 [mM]	25	0.5	1	10					MgCl2 [mM]	25	0.5	1	10
DMSO [%]	100	0	0	0					DMSO [%]	100	2	1	10
sample DNA [µl]	10÷30 ng/µl		1.5	15					sample DNA, [µl]	10÷30 ng/µl		3	30
ddH2O				375					ddH2O				347.5
Primers	Sequence (5'-3')								Primers	Sequence (5'-3')
IMP-new_Clon_F	GCCGCGCGGCAGCCATATGAAAAAATTATTTGTTTTATGC								pet28A-IMP_tail_LR	TCTCGATCCTCTACGCCGGAC
IMP-new_Clon_R	GGTGGTGGTGCTCGAGTTAGTTACTTGGCAGTGATG								pet28A-IMP_tail_RF	GCTGAAAGGAGGAACTATATCC
Table S2. Insert amplification PCR and vector linearization PCR protcols In brief, the PCR reactions for blaIMP insert amplification consisted of 50 µl volume of 0,04 U proofreading onHybrid polymerase (EURX Sp. z o.o., Gdańsk, Poland), 1x buffer, 0.3 µM of each primer, 0.2 mM dNTPs, additional 0.5 mM MgCl2 and 1.5 µl (10-30 ng/µl DNA conc.). PCR cycling parameters were 98°C 10 min, (97°C 10 sec,…

## Sheet: S3. Clonning schematic
Figure S3. A schematic representation of the clonning strategy
Figure S3. The pET28a T7pCONS TIR-2 sfGFP vector is initially designed for bacterial expression. To avoid bias in MIC values measurements in transformants by overexpression of the insert from T7 promoter, the entire region upstream from T7 promoter and downstream from T7 terminator was knocked out by designing specific primer pairs for vector linearization. The insert consisted of the blaIMP-100 …

## Sheet: S4. Expression analysis
Table S4. Expression analysis results
Strain	mexA	mexC	mexE	mexX	oprD	ampC	Color interpretation According to Cabot et al. (2011) and for oprD Wi et al. (2018)
PAO1	1	1	1	1	1	1		mexC, mexE, mexX, ampC	mexA	oprD relevant reduction
Paer3541	1.82504	1.19241	0.631566	20.3939	0	0	overexpression	X > 10	X > 3	X ≤ 30%
Paer3796A	0.933733	1.43867	0.904782	8.31913	0.00165352	0	borderline	5 < X < 10	2 < X < 3
Paer4782MK	1.10557	6.48862	1.06336	3.05896	0	0.803407	negative	X < 5	X < 2
Table S4. OprD primer pairs did not work in our strains and the results are therefore invalid and colored in red. See the discussion section for explanation.

## Sheet: S5. Genome Quality
Table S4. Genomes quality
QUAST v5.0.2
Assembly	contigs (>= 0 bp)	contigs (>= 1000 bp)	contigs (>= 5000 bp)	contigs (>= 10000 bp)	contigs (>= 25000 bp)	contigs (>= 50000 bp)	Total length (>= 0 bp)	Total length (>= 1000 bp)	Total length (>= 5000 bp)	Total length (>= 10000 bp)	Total length (>= 25000 bp)	Total length (>= 50000 bp)	# contigs	Largest contig	Total length	GC (%)	N50	N75	L50	L75	N's per 100 kbp
Paer3541	4	4	4	3	3	2	7083871	7083871	7083871	7076762	7076762	7035449	4	6856166	7083871	65.71	6856166	6856166	1	1	0
Paer3796A	2	2	2	2	2	2	7180077	7180077	7180077	7180077	7180077	7180077	2	7001594	7180077	65.67	7001594	7001594	1	1	0
Paer4782MK	3	3	3	3	3	3	7420082	7420082	7420082	7420082	7420082	7420082	3	7068094	7420082	65.58	7068094	7068094	1	1	0
BUSCO v5.4.6
Strain	Dataset	Complete	Single	Duplicated	Fragmented	Missing	n_markers	Scaffold N50	Contigs N50	Percent gaps	Number of scaffolds
Paer3541	bacteria_odb10	100	99.2	0.8	0	0	124	6856166	6856166	0	4
Paer3796A	bacteria_odb10	100	99.2	0.8	0	0	124	7001592	7001592	0	2
Paer4782MK	bacteria_odb10	100	99.2	0.8	0	0	124	7092247	7092247	0	3
CheckM v1.2.1
Strain	Marker Lineage	Completeness (%)	Contamination (%)
Paer3541	o__Pseudomonadales (UID4488)	99.68	0.63
Paer3796A	o__Pseudomonadales (UID4488)	99.68	0.63
Paer4782MK	o__Pseudomonadales (UID4488)	99.68	0.7

## Sheet: S6. MOB Suite results
Table S6. Mob Suite report for all plasmids included in the study
sample_id	Info	num_contigs	size	gc	md5	rep_type(s)	rep_type_accession(s)	relaxase_type(s)	relaxase_type_accession(s)	mpf_type	mpf_type_accession(s)	orit_type(s)	orit_accession(s)	predicted_mobility	mash_nearest_neighbor	mash_neighbor_distance	mash_neighbor_identification	primary_cluster_id	secondary_cluster_id	predicted_host_range_overall_rank	predicted_host_range_overall_name	observed_host_range_ncbi_rank	observed_host_range_ncbi_name
OX638703.1 Paer4782MK plasmid: p4782-IMP	Study strain	1	61494	0.577878	735a52b89c0dc03c825ef9214f5dc991	rep_cluster_688	002152__NC_019906_00045	MOBF	NC_019906_00069	MPF_T	NC_019906_00068	-	-	conjugative	MK671725	0.0358575	Pseudomonas mosselii	AF515	AP475	genus	Pseudomonas	genus	Pseudomonas
OX638702.1 Paer4782MK plasmid: p4782_002	Study strain	1	290802	0.569467	34d9745b32bdf40334cddd75d3fcc2f0	-	-	-	-	-	-	-	-	non-mobilizable	CP040459	0.170926	Pseudomonas stutzeri	AF440	AP388	-	-	-	-
OX638611.1 Paer3541 plasmid: p3541_1	Study strain	1	179283	0.595143	8060abfbc29b53f809e74788ca248f88	-	-	-	-	-	-	-	-	non-mobilizable	CP041355	0.015508	Pseudomonas aeruginosa	AC882	AM239	genus	Pseudomonas	genus	Pseudomonas
OX638612.1 Paer3541 plasmid: p3541_2	Study strain	1	41313	0.591412	7a4aea061fdfb5908045c69680cc1748	rep_cluster_688	002152__NC_019906_00045	MOBF	NC_019906_00069	MPF_T	NC_019906_00068	-	-	conjugative	MK047610	0.0280449	Pseudomonas aeruginosa	AF514	AP472	genus	Pseudomonas	genus	Pseudomonas
OX638565.1 Paer3796A plasmid: p3796A	Study strain	1	178483	0.59581	3ab9aaa3ca986b86c85de766c4d6e6b6	-	-	-	-	-	-	-	-	non-mobilizable	CP041355	0.0164427	Pseudomonas aeruginosa	AC882	AM239	genus	Pseudomonas	genus	Pseudomonas
AP022476	phylogenetic tree	1	44219	0.585812	70e8478f25130d2adf9fa75757953e00	rep_cluster_688	002152__NC_019906_00045	MOBF	NC_019906_00069	MPF_T	NC_019906_00068	-	-	conjugative	CP016446	0.0133059	Pseudomonas putida	AF515	AP475	genus	Pseudomonas	genus	Pseudomonas
CP003739.1	phylogenetic tree	1	80360	0.600324	9a505a05a802195fa9e2eb58f5e5a27a	rep_cluster_688	002152__NC_019906_00045	MOBF	NC_019906_00069	MPF_T	NC_019906_00068	-	-	conjugative	CP003739	0	Pseudomonas putida HB3267	AF515	AP473	genus	Pseudomonas	genus	Pseudomonas
CP016446	phylogenetic tree	1	52710	0.591709	0cf3da550d3a2cdf5c5dac045d2a4a52	rep_cluster_688	002152__NC_019906_00045	MOBF	NC_019906_00069	MPF_T	NC_019906_00068	-	-	conjugative	CP016446	0	Pseudomonas putida	AF515	AP475	genus	Pseudomonas	genus	Pseudomonas
CP027168	phylogenetic tree	1	57053	0.608592	12e83709e6e48223c938b51dac6c653c	rep_cluster_688	002152__NC_019906_00045	MOBF	NC_019906_00069	MPF_T	NC_019906_00068	-	-	conjugative	CP027168	0	Pseudomonas aeruginosa	AA355	AI312	genus	Pseudomonas	genus	Pseudomonas
CP029092	phylogenetic tree	1	57052	0.608585	ad9f781b36a56ea92510e567fd093576	rep_cluster_688	002152__NC_019906_00045	MOBF	NC_019906_00069	MPF_T	NC_019906_00068	-	-	conjugative	CP029092	0	Pseudomonas aeruginosa	AA355	AI312	genus	Pseudomonas	genus	Pseudomonas
CP066307	phylogenetic tree	1	80360	0.600311	858fab9ae3cd7d5f4df5f4c44f6ac459	rep_cluster_688	002152__NC_019906_00045	MOBF	NC_019906_00069	MPF_T	NC_019906_00068	-	-	conjugative	CP003739	0	Pseudomonas putida HB3267	AF515	AP473	genus	Pseudomonas	genus	Pseudomonas
CP083369	phylogenetic tree	1	69506	0.58182	c21dd9fb3334ec929cf2632be193f739	rep_cluster_688	002152__NC_019906_00045	MOBF	NC_019906_00069	MPF_T	NC_019906_00068	-	-	conjugative	DQ126685	0.0325113	Pseudomonas sp. CT14	AF514	AP471	genus	Pseudomonas	genus	Pseudomonas
CP095773	phylogenetic tree	1	42977	0.590642	93aae066eb5fbf8832a5897455808ecf	rep_cluster_688	002152__NC_019906_00045	-	-	MPF_T	NC_019906_00068	-	-	non-mobilizable	CP003739	0.0565317	Pseudomonas putida HB3267	AF515	AP473	genus	Pseudomonas	genus	Pseudomonas
CP095775	phylogenetic tree	1	42729	0.591004	244daa62ab190cf6f29fe3a817e1e0f5	rep_cluster_688	002152__NC_019906_00045	-	-	MPF_T	NC_019906_00068	-	-	non-mobilizable	CP003739	0.0563082	Pseudomonas putida HB3267	AF515	AP473	genus	Pseudomonas	genus	Pseudomonas
DQ126685	phylogenetic tree	1	55216	0.616542	d712234838796cb49b6bb107a1bd881c	rep_cluster_688	002152__NC_019906_00045	MOBF	NC_019906_00069	MPF_T	NC_019906_00068	-	-	conjugative	DQ126685	0	Pseudomonas sp. CT14	AF514	AP471	genus	Pseudomonas	genus	Pseudomonas
KY630469	phylogenetic tree	1	32207	0.585991	2da976b0eb7539ddb12b1b79b78caf28	rep_cluster_688	002152__NC_019906_00045	MOBF	NC_019906_00069	MPF_T	NC_019906_00068	-	-	conjugative	KY630469	0	Pseudomonas aeruginosa	AF515	AP476	genus	Pseudomonas	genus	Pseudomonas
MK047610	phylogenetic tree	1	42035	0.564363	52c0a830978204d4994f131836492287	rep_cluster_688	002152__NC_019906_00045	MOBF	NC_019906_00069	MPF_T	NC_019906_00068	-	-	conjugative	MK047610	0	Pseudomonas aeruginosa	AF514	AP472	genus	Pseudomonas	genus	Pseudomonas
MK047611.1	phylogenetic tree	1	34948	0.592881	866f6c5f3d8ea96796c5d9afe8882b76	rep_cluster_688	002152__NC_019906_00045	MOBF	NC_019906_00069	MPF_T	NC_019906_00068	-	-	conjugative	KY630469	0.0269047	Pseudomonas aeruginosa	AF515	AP476	genus	Pseudomonas	genus	Pseudomonas
MK671725	phylogenetic tree	1	52002	0.593189	9a297c1ee0bc9b9af6c6e19faebec08e	rep_cluster_688	002152__NC_019906_00045	MOBF	NC_019906_00069	MPF_T	NC_019906_00068	-	-	conjugative	MK671725	0	Pseudomonas mosselii	AF515	AP475	genus	Pseudomonas	genus	Pseudomonas
MK671726	phylogenetic tree	1	102812	0.590914	fe3a64551833ab88325bc0774e31c768	IncP,rep_cluster_398,rep_cluster_688	000167__AJ344068_00003,001720__CP003962,002152__NC_019906_00045	MOBF	NC_003350_00125	MPF_T	NC_003350_00124,NC_003350_00132,NC_003350_00133,NC_003350_00134,NC_003350_00138	MOBF	NZ_AFYG01000108	conjugative	MK671726	0	Pseudomonas mendocina	AF916	AP924	multi-phylla	Actinomycetota,Pseudomonadota	multi-phylla	Actinomycetota,Pseudomonadota
MK671727	phylogenetic tree	1	55387	0.599671	a6563123e5437022b0b71c694c7a1953	rep_cluster_688	002152__NC_019906_00045	MOBF	NC_019906_00069	MPF_T	NC_019906_00068	-	-	conjugative	MK671725	0.00683925	Pseudomonas mosselii	AF515	AP475	genus	Pseudomonas	genus	Pseudomonas
MN961669	phylogenetic tree	1	42579	0.597759	91f27d1484babe27e420b27855665b5f	rep_cluster_688	002152__NC_019906_00045	MOBF	NC_019906_00069	MPF_T	NC_019906_00068	-	-	conjugative	MK671725	0.0455159	Pseudomonas mosselii	AF515	AP475	genus	Pseudomonas	genus	Pseudomonas
MZ673648	phylogenetic tree	1	71715	0.588036	312f616f89e44148ff74205e0df0d29b	rep_cluster_688	002152__NC_019906_00045	MOBF	NC_019906_00069	MPF_T	NC_019906_00068	-	-	conjugative	MK671725	0.0205456	Pseudomonas mosselii	AF515	AP475	genus	Pseudomonas	genus	Pseudomonas
OL780449	phylogenetic tree	1	42750	0.591064	31f4261cd7411640204cced821d1b439	rep_cluster_688	002152__NC_019906_00045	-	-	MPF_T	NC_019906_00068	-	-	non-mobilizable	CP003739	0.0563082	Pseudomonas putida HB3267	AF515	AP473	genus	Pseudomonas	genus	Pseudomonas
OX638612	phylogenetic tree	1	41313	0.591412	7a4aea061fdfb5908045c69680cc1748	rep_cluster_688	002152__NC_019906_00045	MOBF	NC_019906_00069	MPF_T	NC_019906_00068	-	-	conjugative	MK047610	0.0280449	Pseudomonas aeruginosa	AF514	AP472	genus	Pseudomonas	genus	Pseudomonas
OX638703.1	phylogenetic tree	1	61494	0.577878	735a52b89c0dc03c825ef9214f5dc991	rep_cluster_688	002152__NC_019906_00045	MOBF	NC_019906_00069	MPF_T	NC_019906_00068	-	-	conjugative	MK671725	0.0358575	Pseudomonas mosselii	AF515	AP475	genus	Pseudomonas	genus	Pseudomonas

## Sheet: S7. oprD analysis
Table S7. PorinPredict report with genomes from this study
Assembly ID	oprD promoter integrity (alignment coverage)	oprD nucleotide sequence alignment coverage	OprD variant hit (AA level)	OprD alignment coverage (AA level)	OprD sequence identity (%; AA level)	OprD integrity (AA level)	Missense/nonsense mutations	PorinPredict final classification
Paer3541	complete (100%)	1326/1326 (100%)	OprD_5	441/441 (100%)	100	intact - exact match		OprD intact
Paer3796A	complete (100%)	1326/1326 (100%)	OprD_5	441/441 (100%)	99.8	intact - missense mutation	S325F	OprD intact but rare AA substitution	https://journals.asm.org/doi/10.1128/mSystems.00465-19
Paer4782MK	complete (100%)	1173/1326 (88.46%)	OprD_1	404/441 (91.6%)	96.8	truncated		OprD inactivated

## Sheet: S8. Virulence factors
Table S8. Virulence factors
Virulence factor class	Virulence factors	Related genes	3796A	3541	4782MK	P.aeruginosa PAO1
Adherence	Flagella	flaG	+	+	+	+
		fleN	+	+	+	+
		fleQ	+	+	+	+
		fleR	+	+	+	+
		fleS	+	+	+	+
		flgA	+	+	+	+
		flgB	+	+	+	+
		flgC	+	+	+	+
		flgD	+	+	+	+
		flgE	+	+	+	+
		flgF	+	+	+	+
		flgG	+	+	+	+
		flgH	+	+	+	+
		flgI	+	+	+	+
		flgJ	+	+	+	+
		flgK	+	+	+	+
		flgL	+	+	+	+
		flgM	+	+	+	+
		flgN	+	+	+	+
		flhA	+	+	+	+
		flhB	+	+	+	+
		flhF	+	+	+	+
		fliA	+	+	+	+
		fliC	+	+	+	+
		fliD	+	+	+	+
		fliE	+	+	+	+
		fliF	+	+	+	+
		fliG	+	+	+	+
		fliH	+	+	+	+
		fliI	+	+	+	+
		fliJ	+	+	+	+
		fliK	+	+	+	+
		fliL	+	+	+	+
		fliM	+	+	+	+
		fliN	+	+	+	+
		fliO	+	+	+	+
		fliP	+	+	+	+
		fliQ	+	+	+	+
		fliR	+	+	+	+
		fliS	+	+	+	+
		fliT	+	+	+	+
		motA	+	+	+	+
		motB	+	+	+	+
		motC	+	+	+	+
		motD	+	+	+	+
		motY	+	+	+	+
	LPS O-antigen (P. aeruginosa)	Undetermined	+	+	+	+
	Type IV pili biosynthesis	fimT	+	+	+	+
		fimU	+	+	+	+
		fimV	+	+	+	+
		pilA	+	+	+	+
		pilB	+	+	+	+
		pilC	+	+	+	+
		pilD	+	+	+	+
		pilE	+	+	+	+
		pilF	+	+	+	+
		pilM	+	+	+	+
		pilN	+	+	+	+
		pilO	+	+	+	+
		pilP	+	+	+	+
		pilQ	+	+	+	+
		pilR	+	+	+	+
		pilS	+	+	+	+
		pilT	+	+	+	+
		pilU	+	+	+	+
		pilV	+	+	+	+
		pilW	+	+	+	+
		pilX	+	+	+	+
		pilY1	+	+	+	+
		pilY2	+	+	+	+
		pilZ	+	+	+	+
	Type IV pili twitching motility related proteins	chpA	+	+	+	+
		chpB	+	+	+	+
		chpC	+	+	+	+
		chpD	+	+	+	+
		chpE	+	+	+	+
		pilG	+	+	+	+
		pilH	+	+	+	+
		pilI	+	+	+	+
		pilJ	+	+	+	+
		pilK	+	+	+	+
Antimicrobial activity	Phenazines biosynthesis	phzA1	+	+	+	+
		phzA2	+	+	+	+
		phzB1	+	+	+	+
		phzB2	+	+	+	+
		phzC1	+	+	+	+
		phzC2	-	-	-	+
		phzD1	+	+	+	+
		phzD2	-	-	-	+
		phzE1	+	+	+	+
		phzE2	-	-	-	+
		phzF1	+	+	+	+
		phzF2	-	-	-	+
		phzG1	+	+	+	+
		phzG2	-	-	-	+
		phzH	+	+	+	+
		phzM	+	+	+	+
		phzS	+	+	+	+
Antiphagocytosis	Alginate biosynthesis - alg operon; Function: enhance bacterial tolerance to harsh survival environments such as desiccation, oxidizing agents, and host defense (Franklin et al., 2011). Biofilm formation	alg44	+	+	+	+
		alg8	+	+	+	+
		algA	+	+	+	+
		algC	+	+	+	+
		algD	+	+	+	+
		algE	+	+	+	+
		algF	+	+	+	+
		algG	+	+	+	+
		algI	+	+	+	+
		algJ	+	+	+	+
		algK	+	+	+	+
		algL	+	+	+	+
		algX	+	+	+	+
	Alginate regulation	algP/algR3	+	+	+	+
		algQ	+	+	+	+
		algR	+	+	+	+
		algU	+	+	+	+
		algW	+	+	+	+
		algZ	+	+	+	+
		mucA	+	+	+	+
		mucB	+	+	+	+
		mucC	+	+	+	+
		mucD	+	+	+	+
		mucE	+	+	+	+
		mucP	+	+	+	+
Biosurfactant	Rhamnolipid biosynthesis	rhlA	+	+	+	+
		rhlB	+	+	+	+
		rhlC	+	+	+	+
Enzyme	Hemolytic phospholipase C	plcH	+	+	+	+
	Non-hemolytic phospholipase C	plcN	+	+	+	+
	Phospholipase C	plcB	+	+	+	+
	Phospholipase D	pldA	+	+	-	+
Iron uptake	Pyochelin receptor	fptA	+	+	+	+
	Pyochelin	pchA	+	+	+	+
		pchB	+	+	+	+
		pchC	+	+	+	+
		pchD	+	+	+	+
		pchE	+	+	+	+
		pchF	+	+	+	+
		pchG	+	+	+	+
		pchH	+	+	+	+
		pchI	+	+	+	+
		pchR	+	+	+	+
	Pyoverdine receptors	fpvA	+	+	+	+
	Pyoverdine	pvdA	+	+	+	+
		pvdD	+	+	-	+
		pvdE	+	+	+	+
		pvdF	+	+	+	+
		pvdG	+	+	+	+
		pvdH	+	+	+	+
		pvdI	+	+	+	+
		pvdJ	+	+	+	+
		pvdL	+	+	+	+
		pvdM	+	+	+	+
		pvdN	+	+	+	+
		pvdO	+	+	+	+
		pvdP	+	+	+	+
		pvdQ	+	+	+	+
		pvdS	+	+	+	+
		pvdY	+	+	+	+
Protease	Alkaline protease	aprA	+	+	+	+
	Elastase	lasA	+	+	+	+
		lasB	+	+	+	+
	Protease IV	prpL	+	+	+	+
Quorum sensing	Acylhomoserine lactone synthase	hdtS	+	+	+	+
	N-(3-oxo-dodecanoyl)-L-homoserine lactone QS system	lasI	+	+	+	+
		lasR	+	+	+	+
	N-(butanoyl)-L-homoserine lactone QS system	rhlI	+	+	+	+
		rhlR	+	+	+	+
	GacS/GacA two-component system	gacA	+	+	+	+
Regulation		gacS	+	+	+	+
Secretion system	Hcp secretion island-1 encoded type VI secretion system (H-T6SS)	clpV1	+	+	+	+
		fha1	+	+	+	+
		hcp1	+	+	+	+
		icmF1	+	+	+	+
		ppkA	+	+	+	+
		pppA	+	+	+	+
		vgrG1	+	+	+	+
	P. aeruginosa T3SS translocated effectors	exoS	+	+	+	+
		exoT	+	+	+	+
		exoU	-	-	-	-
		exoY	+	+	+	+
	P. aeruginosa TTSS	exsA	+	+	+	+
		exsB	+	+	+	+
		exsC	+	+	+	+
		exsD	+	+	+	+
		exsE	+	+	+	+
		pcr1	+	+	+	+
		pcr2	+	+	+	+
		pcr3	+	+	+	+
		pcr4	+	+	+	+
		pcrD	+	+	+	+
		pcrG	+	+	+	+
		pcrH	+	+	+	+
		pcrR	+	+	+	+
		pcrV	+	+	+	+
		popB	+	+	+	+
		popD	+	+	+	+
		popN	+	+	+	+
		pscB	+	+	+	+
		pscC	+	+	+	+
		pscD	+	+	+	+
		pscE	+	+	+	+
		pscF	+	+	+	+
		pscG	+	+	+	+
		pscH	+	+	+	+
		pscI	+	+	+	+
		pscJ	+	+	+	+
		pscK	+	+	+	+
		pscL	+	+	+	+
		pscN	+	+	+	+
		pscO	+	+	+	+
		pscP	+	+	+	+
		pscQ	+	+	+	+
		pscR	+	+	+	+
		pscS	+	+	+	+
		pscT	+	+	+	+
		pscU	+	+	+	+
	ACE T6SS(Escherichia)	aec16	+	+	+	-
Toxin	Exotoxin A (ETA)	toxA	+	+	+	+
	Hydrogen cyanide production	hcnA	+	+	+	+
		hcnB	+	+	+	+
		hcnC	+	+	+	+
Stress adaptation	Catalase-peroxidase(Mycobacterium)	katG	-	-	+	-

## Sheet: S9. ICEs
Figure S9. Comparison of chromosomal ICEs between the isolates from this study and PaerIMP-13 isolate (CP034354.1)
Figure S9. Comparison of chromosomal ICEs between the isolates from this study and PaerIMP-13 isolate (CP034354.1). Purple ICEs indicate the presence of carbapenemase genes, while green and gray ICEs – their absence. ICEs linked together exhibit high similarity.
